# Supplementary material for: Concentrations, Size Distribution, and Community Structure Characteristics of Culturable Airborne Antibiotic-Resistant Bacteria in Xinxiang, Central China
Source: MDPI journal article supplement (doi:10.3390/atmos12081077), 2021-08-22
Supplement: s1 [file s1]

## Supporting Information

**Topic:** Concentrations, size distribution, and community structure characteristics of culturable airborne antibiotic-resistant bacteria in Xinxiang, Central China

**Authors:** Xu Yan<sup>1\*</sup>, Jiahui Ma<sup>1</sup>, Jingyuan Ren<sup>1</sup>, Mengjia Cui<sup>1</sup>, Xinqing Chen<sup>1</sup>, Dezhi Qiu<sup>1</sup>, Miao Lei<sup>1</sup>, Tianning Li<sup>1</sup>, Li Guo<sup>2</sup>, Chun Chen<sup>2</sup>, Yunping Han<sup>3</sup>

1. School of Environment, Key Laboratory for Yellow River and Huai River Water Environment and Pollution Control, Ministry of Education, Henan Key Laboratory for Environmental Pollution Control, Henan Normal University, Xinxiang 453007, China.

2. Henan Environmental Monitoring Center, Henan Key Laboratory of Environmental Monitoring Technology, Zhengzhou 450046, China.

3. Research Center for Eco-Environmental Sciences, Chinese Academy of Sciences, Beijing 100085, China.

**Corresponding author:** Xu Yan, Email: [yanxu@htu.cn](mailto:yanxu@htu.cn)

**Figure captions:**

**Figure S1.** The geographical location of sampling site.

**Figure S2.** Size distribution of culturable bacteria and four antibiotic-resistant bacteria under different air quality levels.

**Figure S3.** The relative percentage of respirable and fine particles under different weather conditions.

**Table caption:**

**Table S1.** Parameters used in risk assessment.



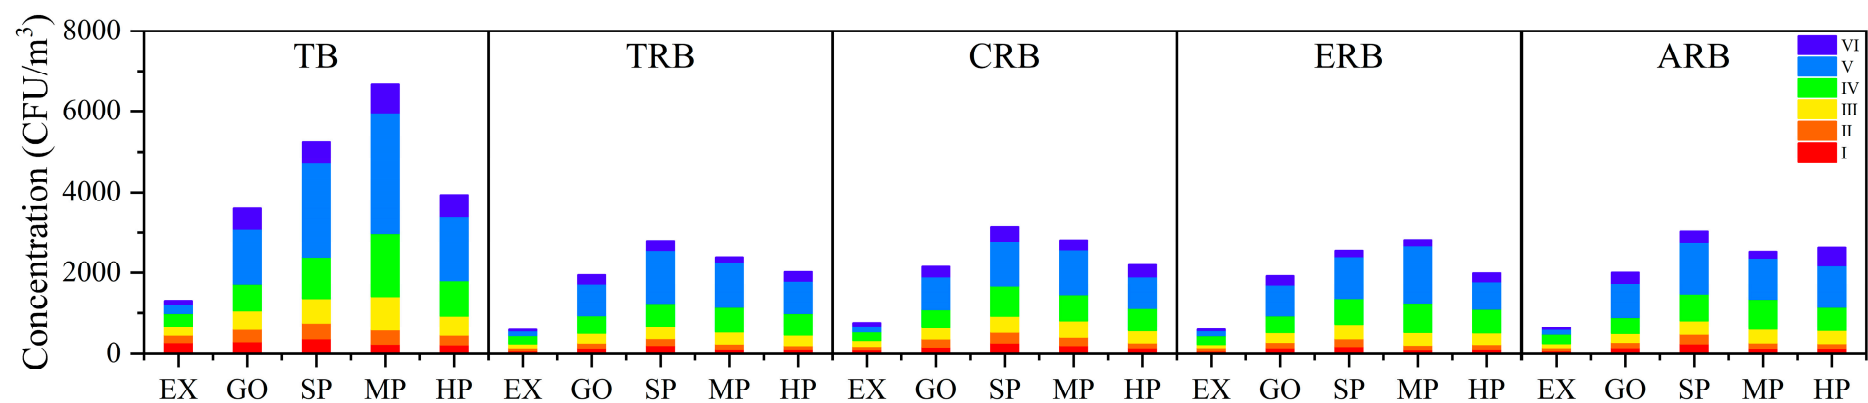

**Figure S2.** Size distribution of culturable bacteria and four antibiotic-resistant bacteria under different air quality levels.

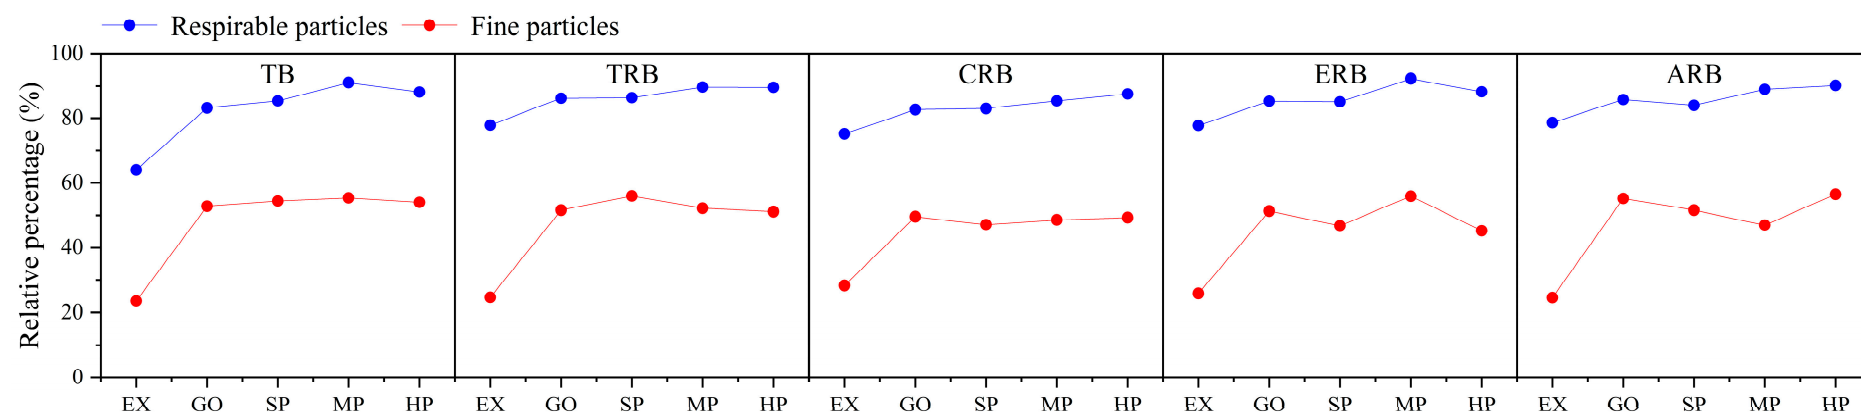

**Figure S3.** The relative percentage of respirable and fine particles under different weather conditions.

**Table S1.** Parameters used in risk assessment.

| Parameters                              | Units                  | Values   |            |              |
|-----------------------------------------|------------------------|----------|------------|--------------|
|                                         |                        | Children | adult male | adult female |
| Inhalation rate ( <i>IR</i> )           | m <sup>3</sup> /d      | 7.60     | 19.02      | 14.17        |
| Exposure frequency ( <i>EF</i> )        | d/yr                   |          | 180        |              |
| Exposure time( <i>ET</i> )              | yr                     | 6        |            | 24           |
| Body weight ( <i>BW</i> )               | kg                     | 15.0     | 62.7       | 54.4         |
| Skin surface area ( <i>SA</i> )         | m <sup>2</sup>         | 0.115    |            | 0.215        |
| Skin adherence factor ( <i>SL</i> )     | kg/(m <sup>3</sup> ·d) | 0.20     |            | 0.07         |
| Dermal absorption factor ( <i>ABS</i> ) |                        |          | 0.001      |              |
| Averaging time ( <i>AT</i> )            | d                      | 16 × 365 | 69.6 × 365 | 73.3 × 365   |
| RfD                                     | CFU/m <sup>3</sup>     |          | 500        |              |
