# Supplementary material for: Concentrations, Size Distribution, and Community Structure Characteristics of Culturable Airborne Antibiotic-Resistant Bacteria in Xinxiang, Central China
Source: MDPI journal article supplement (doi:10.3390/atmos12081077), 2021-08-22
Supplement: s1 [file s1]

Archive with 1 entries (1 files):
- atmosphere-1334218-supplementary.pdf
